# Supplementary material for: Implementation and Effectiveness of Novel Therapeutic Substances for Advanced Malignant Melanoma in Saxony, Germany, 2010–2020—Cohort Study Based on Administrative Data
Source: MDPI journal article supplement (doi:10.3390/cancers13246150), 2021-12-07
Supplement: s1 [file s1]

## Supplement

**Table~S1. Case definitions (metastatic melanoma)**

| Valid case                                                                              | Criteria                                                                                                                                                                                                                                                                                                                                                                                                                                                                                                                                                                                                                                                                                                                                                                                                                                                                                                                                                 |
|-----------------------------------------------------------------------------------------|----------------------------------------------------------------------------------------------------------------------------------------------------------------------------------------------------------------------------------------------------------------------------------------------------------------------------------------------------------------------------------------------------------------------------------------------------------------------------------------------------------------------------------------------------------------------------------------------------------------------------------------------------------------------------------------------------------------------------------------------------------------------------------------------------------------------------------------------------------------------------------------------------------------------------------------------------------|
| Incident metastatic melanoma of skin                                                    | <p>a) Age <math>\geq 18</math> years</p> <p>b) Continuously insured between 2010 and 2020; deceased persons were included (2012-2020)</p> <p>c) Washout Phase 2010-2011 – individuals with one inpatient or one confirmed outpatient cancer diagnosis (ICD-10-GM C00-C97, except C44) within the washout phase were excluded</p> <p>d) One inpatient record of ICD-10-GM code C43 or at least three outpatient records with C43 within one year in different quarters issued by a medical specialist (not by a general practitioner); first two records with diagnostic modifier 'confirmed', last record without 'suspicion' or 'exclusion'</p> <p>e) In addition the presence of a synchronous or metachronous distant metastasis (one record of ICD-10-GM C78-79 in inpatient or (confirmed) outpatient data at the same time or after first record of melanoma) – for sensitivity all persons with a locoregional metastasis were included (C77)</p> |
| ICD-10-GM, International Classification of Diseases, 10th Revision, German Modification |                                                                                                                                                                                                                                                                                                                                                                                                                                                                                                                                                                                                                                                                                                                                                                                                                                                                                                                                                          |

Table~S2. Types of therapy and identification codes used

| Type of therapy                    | Sector     | Active substance   | Used Codes          | Coding System |
|------------------------------------|------------|--------------------|---------------------|---------------|
| <b>Classical chemotherapeutics</b> |            |                    |                     |               |
| Chemotherapy                       | inpatient  | Diverse substances | 8-542, 8-543, 8-544 | OPS           |
| Chemotherapy                       | outpatient | Dacarbazine        | L01AX04             | ATC           |
|                                    |            | Mitobronitol       | L01AX01             | ATC           |
|                                    |            | Temozolomide       | L01AX03             | ATC           |
|                                    |            | Hydroxycarbamide   | L01XX05             | ATC           |
|                                    |            | Estramustin        | L01XX11             | ATC           |
|                                    |            | Mitomycin          | L01DC03             | ATC           |
|                                    |            | Cyclophosphamide   | L01AA01             | ATC           |
|                                    |            | Chlorambucil       | L01AA02             | ATC           |
|                                    |            | Melphalan          | L01AA03             | ATC           |
|                                    |            | Lomustine          | L01AD02             | ATC           |
|                                    |            | Methotrexate       | L01BA01             | ATC           |
|                                    |            | Fluorouracil       | L01BC02             | ATC           |
|                                    |            | Capecitabine       | L01BC06             | ATC           |
|                                    |            | Diverse substances | 96502               | GOP           |
|                                    |            | Diverse substances | 96503               | GOP           |
| Interferon                         | outpatient | Diverse substances | 9999092             | PZN           |
|                                    | outpatient | Interferon         | L03AB               | ATC           |
| <b>Novel therapies</b>             |            |                    |                     |               |
| Targeted therapy                   | inpatient  | Vemurafenib        | 6-006.f             | OPS           |
|                                    |            | Dabrafenib         | 6-007.5             | OPS           |
|                                    |            | Encorafenib        | 6-00b.9             | OPS           |
|                                    |            | Binimetinib        | 6-00b.2             | OPS           |
|                                    |            | Cobimetinib        | 6-008.c             | OPS           |
|                                    |            | Trametinib         | 6-009.7             | OPS           |
|                                    |            | Imatinib           | 6-001.g             | OPS           |
|                                    |            | Dasatinib          | 6-004.3             | OPS           |
|                                    |            | Nilotinib          | 6-004.6             | OPS           |
| Immune Checkpoint Inhibitor        | inpatient  | Nivolumab          | 6-008.m             | OPS           |
|                                    |            | Pembrolizumab      | 6-009.3             | OPS           |
|                                    |            | Ipilimumab         | 6-006.j             | OPS           |
|                                    |            | Atezolizumab       | 6-00a.1             | OPS           |
|                                    |            | Diverse substances | 8-547.0             | OPS           |
|                                    |            | Diverse substances | 8-547.1             | OPS           |
|                                    |            | Diverse substances | 8-547.3             | OPS           |
| Targeted therapy                   | outpatient | Imatinib           | L01XE01             | ATC           |

|                             |            |                    |         |     |
|-----------------------------|------------|--------------------|---------|-----|
|                             |            | Dasatinib          | L01XE06 | ATC |
|                             |            | Nilotinib          | L01XE08 | ATC |
|                             |            | Vemurafenib        | L01XE15 | ATC |
|                             |            | Dabrafenib         | L01XE23 | ATC |
|                             |            | Trametinib         | L01XE25 | ATC |
|                             |            | Cobimetinib        | L01XE38 | ATC |
|                             |            | Binimetinib        | L01XE41 | ATC |
|                             |            | Encorafenib        | L01XE46 | ATC |
| Immune Checkpoint Inhibitor | outpatient | Ipilimumab         | L01XC11 | ATC |
|                             |            | Nivolumab          | L01XC17 | ATC |
|                             |            | Pembrolizumab      | L01XC18 | ATC |
|                             |            | Atezolizumab       | L01XC32 | ATC |
|                             | outpatient | Diverse substances | 2567478 | PZN |
|                             | outpatient | Diverse substances | 96505   | GOP |

OPS Operation and Procedure Classification System

ATC Anatomical Therapeutic Chemical Classification System (DIMDI Version 2020)

PZN Pharmazentralnummer - German identification code for pharmaceutical products

GOP Uniform Value Scale - German assessment standard of the outpatient billing data

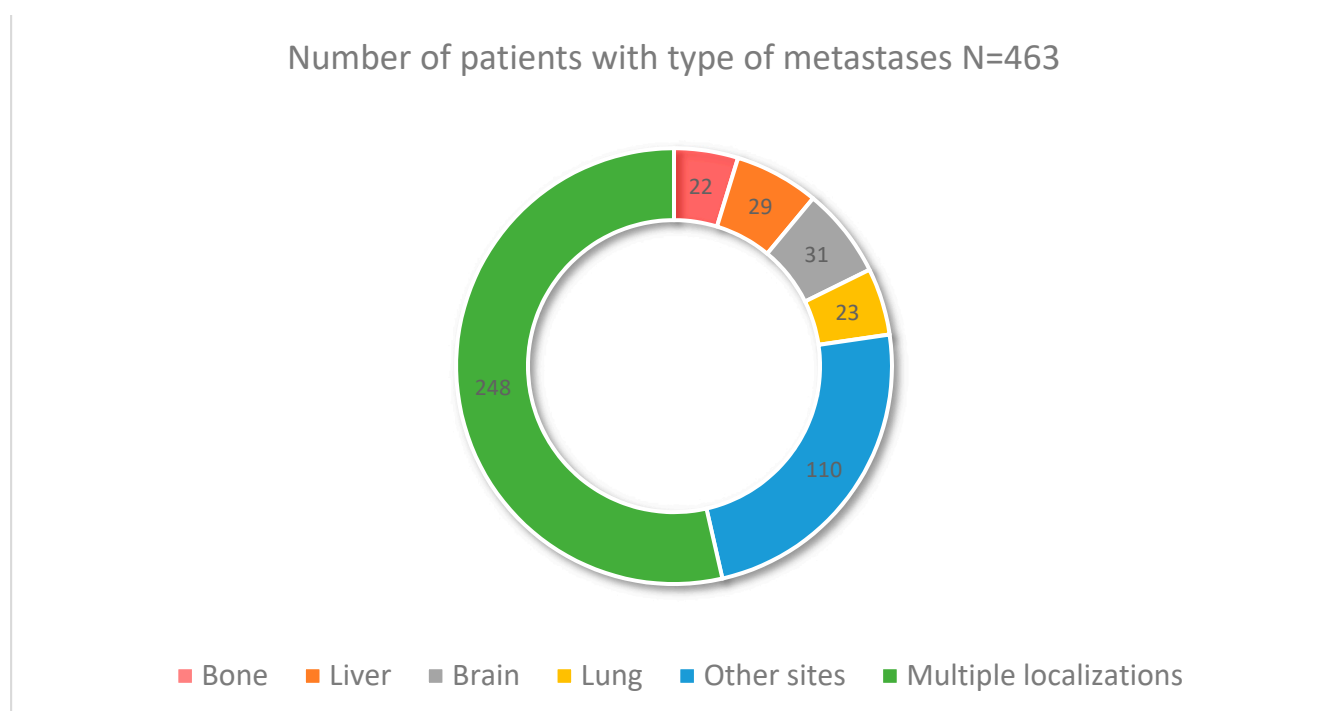

**Figure S1.** Number of patients with single localizations of metastases in bone, liver, brain, lung, or other sites, and with multiple localizations. About 53% of the patients had metastases in multiple localizations.
